# Supplementary material for: Relief of Cystoid Macular Edema-Induced Focal Axonal Compression with Anti-Vascular Endothelial Growth Factor Treatment
Source: PubMed Central journal article supplement — Transl Vis Sci Technol. 2020 Mar 18;9(4):18. doi: 10.1167/tvst.9.4.18 (PMC7396171; doi:10.1167/tvst.9.4.18), 2020-03-18
Supplement: tvst-9-4-18_s002.pdf [file tvst-9-4-18_s002.pdf]

**Supplemental Table 1****Reasons for Exclusion**

|                                        | <b>DME</b> | <b>BRVO</b> |
|----------------------------------------|------------|-------------|
| <b>Media Opacities</b>                 | <b>4</b>   | <b>5</b>    |
| <b>Glaucoma</b>                        | <b>4</b>   | <b>1</b>    |
| <b>Retinal Surgery</b>                 | <b>4</b>   | <b>0</b>    |
| <b>Retinal Laser</b>                   | <b>8</b>   | <b>5</b>    |
| <b>Ocular Surgery &lt;4 Months</b>     | <b>5</b>   | <b>1</b>    |
| <b>Corneal Graft</b>                   | <b>1</b>   | <b>0</b>    |
| <b>Epiretinal Membrane</b>             | <b>4</b>   | <b>17</b>   |
| <b>Vitreomacular Traction Syndrome</b> | <b>2</b>   | <b>1</b>    |
| <b>Intravitreal Steroid Injection</b>  | <b>5</b>   | <b>2</b>    |
| <b>&gt; 7 anti-VEGF Injections</b>     | <b>7</b>   | <b>4</b>    |
| <b>Macular Ischemia</b>                | <b>16</b>  | <b>2</b>    |
